# Supplementary material for: Enhancement of Clover (Trifolium alexandrinum L.) Shade Tolerance and Nitrogen Fixation under Dense Stands-Based Cropping Systems
Source: MDPI journal article supplement (doi:10.3390/agronomy12102332), 2022-09-28
Supplement: s1 [file s1]

Archive with 1 entries (1 files):
- agronomy-1873655-supplementary.pdf
