# Supplementary material for: Enhancement of Clover (Trifolium alexandrinum L.) Shade Tolerance and Nitrogen Fixation under Dense Stands-Based Cropping Systems
Source: MDPI journal article supplement (doi:10.3390/agronomy12102332), 2022-09-28
Supplement: s1 [file s1 › agronomy-1873655-supplementary.pdf]

## Supporting information

### TABLES

**Table S1.** Soil physicochemical properties at the BEG and JBS sites.

### FIGURES

**Figure S1:** Average monthly precipitation and temperature distribution at BEG and JBS sites during the two experimental seasons (2016-2018).

**Figure S1:** Clover root colonization by *P. thivervalensis* T124 according to the different treatments within the experiment 1 (A) and the experiment 2 (B).

**Table S1. Soil physicochemical properties at the BEG and JBS sites.**

|                                                      | <b>Beja El Gnadil (BEG)</b> | <b>Jendouba Bou-Salem (JBS)</b> |
|------------------------------------------------------|-----------------------------|---------------------------------|
| pH                                                   | 6.52                        | 6.71                            |
| EC (us cm <sup>-1</sup> )                            | 175.21                      | 184.21                          |
| Sand (%)                                             | 11                          | 46                              |
| Clay (%)                                             | 36                          | 28                              |
| Silt (%)                                             | 50                          | 24                              |
| Organic matter (%)                                   | 1.6 – 1.8                   | 1.7– 1.8                        |
| C (%)                                                | 1.94                        | 1.68                            |
| P <sub>2</sub> O <sub>5</sub> (mg kg <sup>-1</sup> ) | 45                          | 42                              |
| K <sub>exchangeable</sub> (mg kg <sup>-1</sup> )     | 427.6                       | 402.4                           |
| K <sub>2</sub> O (mg kg <sup>-1</sup> )              | 481.27                      | 438.15                          |

Soil samples were taken at a depth of 0 to 40 cm; EC, electrical conductivity.

## FIGURES

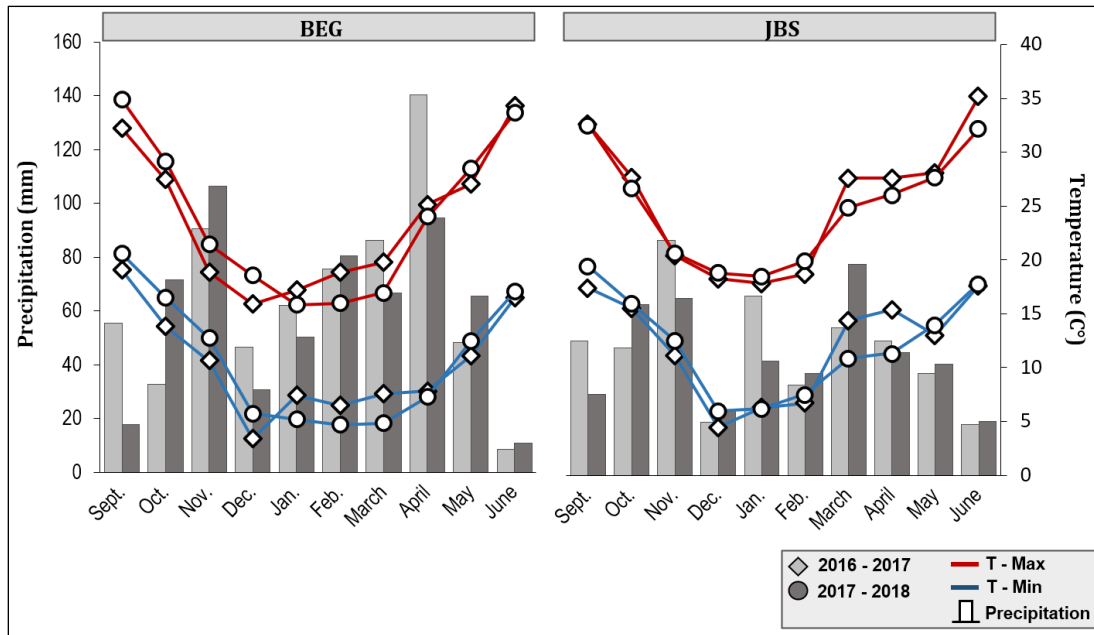

**Figure S1:** Average monthly precipitation and temperature distribution at BEG and JBS sites during the two experimental seasons (2017-2018).

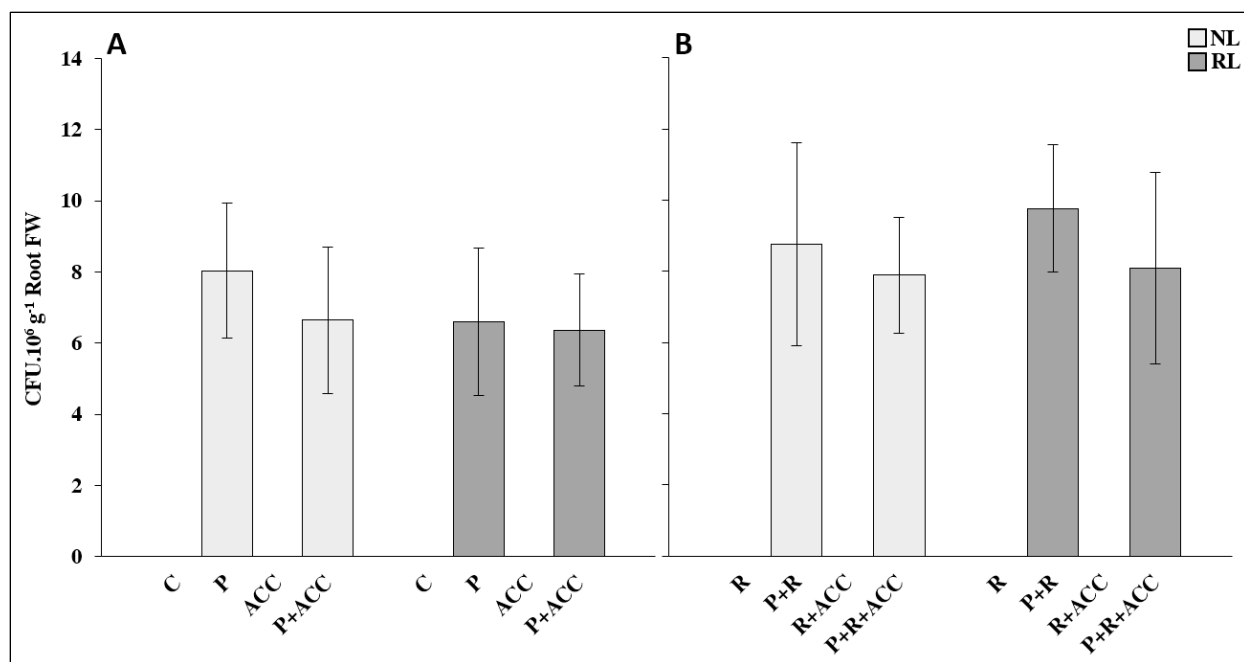

**Figure S1:** Clover root colonization by *P. thivervalensis* T124 according to the different treatment within the experiment 1 (A) and the experiment 2 (B).

C, Control treatment; P, plant inoculated with *P. thivervalensis*; R: inoculated with *R. leguminosarum*; ACC, exogenous ACC; NL, Normal light condition; RL, Reduced light condition.
